# Supplementary material
Source: publisher figshare collection journal article supplement (https://sage.figshare.com/ndownloader/files/17771336)
Supplement: Supplementary file 1 [file 17771336]

**Supplemental material for “Pivotal Response Treatment: A study into the relationship between therapist characteristics and fidelity of implementation”**

*Table 1 Pearson correlations between components of pivotal response treatment and therapist/child characteristics*

| Variable                                | Following the child’s lead | Creating an opportunity | Interspersing maintenance and acquisition tasks |
|-----------------------------------------|----------------------------|-------------------------|-------------------------------------------------|
| 1. Openness to experiences              | .22                        | .12                     | .00                                             |
| 2. Conscientiousness                    | -.04                       | -.12                    | -.03                                            |
| 3. Therapist-child relationship (total) | .25                        | .14                     | -.04                                            |
| 4. Attitude toward EBPs (total)         | .28                        | .13                     | .16                                             |
| 5. Attitude toward EBPs (appeal)        | .08                        | -.05                    | .26                                             |
| 6. Attitude toward EBPs (openness)      | .15                        | .40**                   | .42**                                           |
| 7. Experience with ASD                  | .02                        | .15                     | .21                                             |
| 8. Experience with PRT                  | .12                        | .39*                    | .48**                                           |
| 9. Child age                            | -.13                       | -.36*                   | -.21                                            |
| 10. ASD symptom severity                | -.08                       | -.18                    | -.21                                            |

*Note.* EBPs = evidence-based practices; ASD = autism spectrum disorder; PRT = Pivotal Response Treatment

\*  $p < 0.05$

\*\*  $p < 0.01$

## Data sheet to record fidelity of PRT implementation

Name: \_\_\_\_\_

Videotape: \_\_\_\_\_

Date: \_\_\_\_\_

| Interval | Following the child's lead | Implementing three-term contingency learning trials |                                |    |    |   |    |    |   |                                  |           |    |    |            |    |               |         |      | Interspersing maintenance and acquisition tasks | Total fidelity |
|----------|----------------------------|-----------------------------------------------------|--------------------------------|----|----|---|----|----|---|----------------------------------|-----------|----|----|------------|----|---------------|---------|------|-------------------------------------------------|----------------|
|          |                            | TTC                                                 | Presenting a clear opportunity |    |    |   |    |    |   |                                  | Prompting |    |    | Initiation |    | Reinforcement |         | CTTC |                                                 |                |
|          |                            |                                                     | SC                             | IS | OS | W | IR | CF | S | Description of clear opportunity | M         | OQ | TD | I/A        | XR | CR (I/A)      | CR (XR) |      |                                                 |                |
| 1        | +                          | 1                                                   |                                |    |    |   |    |    |   |                                  |           |    |    |            |    |               |         |      |                                                 |                |
|          |                            | 2                                                   |                                |    |    |   |    |    |   |                                  |           |    |    |            |    |               |         |      |                                                 |                |
|          |                            | 3                                                   |                                |    |    |   |    |    |   |                                  |           |    |    |            |    |               |         |      |                                                 |                |
|          |                            | 4                                                   |                                |    |    |   |    |    |   |                                  |           |    |    |            |    |               |         |      |                                                 |                |
|          |                            | 5                                                   |                                |    |    |   |    |    |   |                                  |           |    |    |            |    |               |         |      |                                                 |                |
| 2        | +                          | 1                                                   |                                |    |    |   |    |    |   |                                  |           |    |    |            |    |               |         |      |                                                 |                |
|          |                            | 2                                                   |                                |    |    |   |    |    |   |                                  |           |    |    |            |    |               |         |      |                                                 |                |
|          |                            | 3                                                   |                                |    |    |   |    |    |   |                                  |           |    |    |            |    |               |         |      |                                                 |                |
|          |                            | 4                                                   |                                |    |    |   |    |    |   |                                  |           |    |    |            |    |               |         |      |                                                 |                |
|          |                            | 5                                                   |                                |    |    |   |    |    |   |                                  |           |    |    |            |    |               |         |      |                                                 |                |
| 3        |                            | 1                                                   |                                |    |    |   |    |    |   |                                  |           |    |    |            |    |               |         |      |                                                 |                |
|          |                            | 2                                                   |                                |    |    |   |    |    |   |                                  |           |    |    |            |    |               |         |      |                                                 |                |
|          |                            | 3                                                   |                                |    |    |   |    |    |   |                                  |           |    |    |            |    |               |         |      |                                                 |                |
|          |                            | 4                                                   |                                |    |    |   |    |    |   |                                  |           |    |    |            |    |               |         |      |                                                 |                |
|          |                            | 5                                                   |                                |    |    |   |    |    |   |                                  |           |    |    |            |    |               |         |      |                                                 |                |
| 4        |                            | 1                                                   |                                |    |    |   |    |    |   |                                  |           |    |    |            |    |               |         |      |                                                 |                |
|          |                            | 2                                                   |                                |    |    |   |    |    |   |                                  |           |    |    |            |    |               |         |      |                                                 |                |
|          |                            | 3                                                   |                                |    |    |   |    |    |   |                                  |           |    |    |            |    |               |         |      |                                                 |                |
|          |                            | 4                                                   |                                |    |    |   |    |    |   |                                  |           |    |    |            |    |               |         |      |                                                 |                |
|          |                            | 5                                                   |                                |    |    |   |    |    |   |                                  |           |    |    |            |    |               |         |      |                                                 |                |
| 5        |                            | 1                                                   |                                |    |    |   |    |    |   |                                  |           |    |    |            |    |               |         |      |                                                 |                |
|          |                            | 2                                                   |                                |    |    |   |    |    |   |                                  |           |    |    |            |    |               |         |      |                                                 |                |
|          |                            | 3                                                   |                                |    |    |   |    |    |   |                                  |           |    |    |            |    |               |         |      |                                                 |                |
|          |                            | 4                                                   |                                |    |    |   |    |    |   |                                  |           |    |    |            |    |               |         |      |                                                 |                |
|          |                            | 5                                                   |                                |    |    |   |    |    |   |                                  |           |    |    |            |    |               |         |      |                                                 |                |

*Note.* TTC = three-term contingency; SC = shared control; IS = in sight, out of reach; OS = out sight, out of reach; W = waiting; IR = interrupting a routine; CF = carrier phrase; S = statement; M = model prompt; OQ = open-ended question prompt; TD = time-delay prompt; I/A = child initiation or attempt; XR = incorrect response; CR (I/A) = natural and contingent reinforcement upon child initiation or attempt; CR (XR) = withholding reinforcement because of incorrect response; CTTC = correct three-term contingency.

**Data sheet to record fidelity of PRT implementation (continued)**

| Interval  | Following the child's lead | Implementing three-term contingency learning trials |                                |    |    |   |    |    |   |                                  |   |    |            |     |               |          |      | Interspersing maintenance and acquisition tasks | Total fidelity |         |
|-----------|----------------------------|-----------------------------------------------------|--------------------------------|----|----|---|----|----|---|----------------------------------|---|----|------------|-----|---------------|----------|------|-------------------------------------------------|----------------|---------|
|           |                            | TTC                                                 | Presenting a clear opportunity |    |    |   |    |    |   | Prompting                        |   |    | Initiation |     | Reinforcement |          | CTTC |                                                 |                |         |
|           |                            |                                                     | SC                             | IS | OS | W | IR | CF | S | Description of clear opportunity | M | OQ | TD         | I/A | XR            | CR (I/A) |      |                                                 |                | CR (XR) |
| 6         |                            | 1                                                   |                                |    |    |   |    |    |   |                                  |   |    |            |     |               |          |      |                                                 |                |         |
|           |                            | 2                                                   |                                |    |    |   |    |    |   |                                  |   |    |            |     |               |          |      |                                                 |                |         |
|           |                            | 3                                                   |                                |    |    |   |    |    |   |                                  |   |    |            |     |               |          |      |                                                 |                |         |
|           |                            | 4                                                   |                                |    |    |   |    |    |   |                                  |   |    |            |     |               |          |      |                                                 |                |         |
|           |                            | 5                                                   |                                |    |    |   |    |    |   |                                  |   |    |            |     |               |          |      |                                                 |                |         |
| 7         |                            | 1                                                   |                                |    |    |   |    |    |   |                                  |   |    |            |     |               |          |      |                                                 |                |         |
|           |                            | 2                                                   |                                |    |    |   |    |    |   |                                  |   |    |            |     |               |          |      |                                                 |                |         |
|           |                            | 3                                                   |                                |    |    |   |    |    |   |                                  |   |    |            |     |               |          |      |                                                 |                |         |
|           |                            | 4                                                   |                                |    |    |   |    |    |   |                                  |   |    |            |     |               |          |      |                                                 |                |         |
|           |                            | 5                                                   |                                |    |    |   |    |    |   |                                  |   |    |            |     |               |          |      |                                                 |                |         |
| 8         |                            | 1                                                   |                                |    |    |   |    |    |   |                                  |   |    |            |     |               |          |      |                                                 |                |         |
|           |                            | 2                                                   |                                |    |    |   |    |    |   |                                  |   |    |            |     |               |          |      |                                                 |                |         |
|           |                            | 3                                                   |                                |    |    |   |    |    |   |                                  |   |    |            |     |               |          |      |                                                 |                |         |
|           |                            | 4                                                   |                                |    |    |   |    |    |   |                                  |   |    |            |     |               |          |      |                                                 |                |         |
|           |                            | 5                                                   |                                |    |    |   |    |    |   |                                  |   |    |            |     |               |          |      |                                                 |                |         |
| 9         |                            | 1                                                   |                                |    |    |   |    |    |   |                                  |   |    |            |     |               |          |      |                                                 |                |         |
|           |                            | 2                                                   |                                |    |    |   |    |    |   |                                  |   |    |            |     |               |          |      |                                                 |                |         |
|           |                            | 3                                                   |                                |    |    |   |    |    |   |                                  |   |    |            |     |               |          |      |                                                 |                |         |
|           |                            | 4                                                   |                                |    |    |   |    |    |   |                                  |   |    |            |     |               |          |      |                                                 |                |         |
|           |                            | 5                                                   |                                |    |    |   |    |    |   |                                  |   |    |            |     |               |          |      |                                                 |                |         |
| 10        |                            | 1                                                   |                                |    |    |   |    |    |   |                                  |   |    |            |     |               |          |      |                                                 |                |         |
|           |                            | 2                                                   |                                |    |    |   |    |    |   |                                  |   |    |            |     |               |          |      |                                                 |                |         |
|           |                            | 3                                                   |                                |    |    |   |    |    |   |                                  |   |    |            |     |               |          |      |                                                 |                |         |
|           |                            | 4                                                   |                                |    |    |   |    |    |   |                                  |   |    |            |     |               |          |      |                                                 |                |         |
|           |                            | 5                                                   |                                |    |    |   |    |    |   |                                  |   |    |            |     |               |          |      |                                                 |                |         |
| Total (%) |                            |                                                     |                                |    |    |   |    |    |   |                                  |   |    |            |     |               |          |      |                                                 |                |         |

*Note.* TTC = three-term contingency; SC = shared control; IS = in sight, out of reach; OS = out sight, out of reach; W = waiting; IR = interrupting a routine; CF = carrier phrase; S = statement; M = model prompt; OQ = open-ended question prompt; TD = time-delay prompt; I/A = child initiation or attempt; XR = incorrect response; CR (I/A) = natural and contingent reinforcement upon child initiation or attempt; CR (XR) = withholding reinforcement because of incorrect response; CTTC = correct three-term contingency.
